# Supplementary material for: Stable colonization of Akkermansia muciniphila educates host intestinal microecology and immunity to battle against inflammatory intestinal diseases
Source: Springer Nature journal article supplement (doi:10.1038/s12276-022-00911-z), 2023-01-04
Supplement: MOESM1 [file 12276_2022_911_MOESM1_ESM.pdf]

## Supplementary Materials

### Supplementary methods

#### *GI dynamics of bacteria*

In order to visualize the dynamics of *A. muciniphila* in the GI tract of DSS mice, fluorescent labelling for *A. muciniphila* was performed firstly. Briefly, *A. muciniphila* ( $OD_{600} = 0.8$ ) suspended in 1 ml anaerobic PBS was co-incubated with 20  $\mu$ M DIR (dissolved in 5  $\mu$ l DMSO) at 37 °C for 1 h. The labelled bacteria were washed by anaerobic PBS three times to remove residual DIR and resuspended with anaerobic PBS following centrifugation (3000 rpm, 5 min). DIR labelled *A. muciniphila* was administrated orally to mice with DSS-induced acute colitis at the concentration of  $1 \times 10^8$  CFU/200  $\mu$ l per mouse. Then, the mice were sacrificed and the intestines were rapidly removed at 0.5 h, 1 h, 1.5 h, 2 h, 3 h and 5 h respectively (three mice at each time point) and stored at 4 °C in dark. *Ex vivo* imaging was used for detecting the *A. muciniphila* in dissected intestines (In-Vivo Master at 635-690 nm with the same exposure time-0.3 s). Data acquisition and analyses were done with built-in software.

#### *Clone formation*

*A. muciniphila* ( $1 \times 10^5$  CFU) from a preculture was incubated in 20 ml liquid BHI medium for 6 h followed by centrifuging at 10000 g for 10 min, and the supernatant was passed through a 0.22  $\mu$ m filter membrane for use. Add fresh liquid BHI medium or supernatant (CM-medium, 100  $\mu$ l) to the MRS solid medium respectively. *L. murinus* suspension ( $OD_{600}=0.4$ ) was diluted 10,000 times by anaerobic PBS and then inoculated into the medium with different pre-

treatment respectively. After culturing for 24 h under strict anaerobic incubator (90% N<sub>2</sub> and 10% H<sub>2</sub>), the number of clones was counted.

### ***L. murinus* experiments**

For growth rate, fresh liquid BHI medium or CM-medium (50 µl) was added to the MRS liquid medium (1 ml) respectively. Then *L. murinus* (OD<sub>600</sub> = 0.4, 10 µl) was inoculated into the pre-treated medium. The OD<sub>600</sub> value was detected at different time points following culturing under strict anaerobic incubator (90% N<sub>2</sub> and 10% H<sub>2</sub>).

To explore the effects of *L. murinus* on acute colitis, the mice with DSS-induced acute colitis were administrated orally with *L. murinus* ( $1 \times 10^8$  CFU/200 µl per mouse) for 3 days while the contrast mice were given sterile PBS with an equivalent volume.

### ***Preparation and characterization of MFe<sub>3</sub>O<sub>4</sub>***

490 mg FeCl<sub>3</sub>•6H<sub>2</sub>O was firstly dissolved in ethylene glycol (20 ml), then 200 µL trisodium citrate dihydrate solution (200 mg) and 1.2 g sodium acetate were added with stirring. After further stirred for 30 min, the mixture was sealed into a Teflon-lined stainless-steel autoclave (50 ml capacity). Then the autoclave was heated to 200 °C and maintained for 6 h. Finally, the products were obtained after washed with deionized water for three times under magnet attraction. To prepare the mannose decorated Fe<sub>3</sub>O<sub>4</sub> nanoclusters (termed as MFe<sub>3</sub>O<sub>4</sub>), D-mannosamine hydrochloride (20 mg, 92.6 µM) and Traut's reagent (13 mg, 92.6 µM) were firstly reacted in 1 ml ultra-dry DMSO with triethylamine (139 µM) as dehydrochloride reagent for 4 h to obtain the sulfhydryl mannose. Then 100 mg Fe<sub>3</sub>O<sub>4</sub> nanoclusters dispersing in 50 ml deionized water were added into above mixture and further shaken at 37 °C for another 4 h to

allow sulfhydryl mannose to chelate onto Fe<sub>3</sub>O<sub>4</sub> nanoclusters. The obtained MFe<sub>3</sub>O<sub>4</sub> was finally acquired after washed with deionized water. The morphology and hydrodynamic diameter, and zeta potentials of Fe<sub>3</sub>O<sub>4</sub> and MFe<sub>3</sub>O<sub>4</sub> nanoclusters were characterized by transmission electron microscope (TEM), scanning electron microscope (SEM) and dynamic laser scattering (DLS) respectively. The magnetic property of MFe<sub>3</sub>O<sub>4</sub> was evaluated through a rubidium magnet. Besides, the IR spectra of Fe<sub>3</sub>O<sub>4</sub>, D-mannosamine hydrochloride and MFe<sub>3</sub>O<sub>4</sub> were characterized by a Fourier transform infrared spectrometer to check the mannose coupling.

#### ***Toxicity assessment of MFe<sub>3</sub>O<sub>4</sub>***

Before preparing AKK@MFe<sub>3</sub>O<sub>4</sub>, the toxicity of MFe<sub>3</sub>O<sub>4</sub> on AKK was firstly evaluated. *A. muciniphila* ( $1 \times 10^8$  CFU) was co-incubated with free MFe<sub>3</sub>O<sub>4</sub> of different concentration (0, 50, 100, 150 and 200 µg/ml on the basis of Fe<sub>3</sub>O<sub>4</sub>) in 1 ml anaerobic PBS for 6 h followed by centrifuging at 3000 rpm for 5 min. After resuspended with 1 ml anaerobic PBS, 10 µl resuspension was inoculated into 1 ml liquid BHI for 12 h. Then the precipitate agglomerate of *A. muciniphila* was observed. All experiments were under anaerobic conditions. For *L. murinus*, *L. murinus* ( $1 \times 10^8$  CFU) was co-incubated with free MFe<sub>3</sub>O<sub>4</sub> of different concentration (0, 50, 100 µg/ml on the basis of Fe<sub>3</sub>O<sub>4</sub>) for 6 h. Finally, 10 µl resuspension (OD<sub>600</sub> = 0.4) was inoculated into 1 ml liquid MRS for 24 h. Then the precipitate agglomerate and OD<sub>600</sub> value were assessed.

#### ***Measurement of connection efficiency***

A standard curve of free MFe<sub>3</sub>O<sub>4</sub> nanoparticles versus absorbance was first established using UV spectroscopy at 300 nm. When the reaction completed, the obtained AKK@ MFe<sub>3</sub>O<sub>4</sub> was

separated (3000 rpm, 5 min) and the supernatant was used to detect the amount of unlinked  $\text{MFe}_3\text{O}_4$ . The connection efficiency is calculated to be 95.14%.

### ***Fluorescence co-localization***

Firstly, the IR 780 labelled  $\text{MFe}_3\text{O}_4$  was prepared by the co-incubation of HS-IR780 (3 mg) with  $\text{MFe}_3\text{O}_4$  (5 mg) in 2.5 ml deionized water under 100 rpm shaking for 4 h. The success of connections was confirmed by UV Spectrum at 785 nm. Then  $\text{MFe}_3\text{O}_4$  labelled by IR780 was used to prepare  $\text{AKK@MFe}_3\text{O}_4$  as described above method described. The obtained  $\text{AKK@MFe}_3\text{O}_4$  was further stained with calcein-AM (a living cell dye) for 1 h followed by imaging *via* confocal microscope to observe the co-localization of  $\text{MFe}_3\text{O}_4$  and *A. muciniphila*.

### ***Mannose treatment***

To explore the effects of mannose (aladdin, Shanghai, China) on acute colitis, the mice with DSS-induced acute colitis were administrated orally with mannose of experimental concentration (10  $\mu\text{g}$ /per mouse, dissolved in PBS) for 3 days while the contrast mice were given PBS with an equivalent volume.

### ***Histology***

For hematoxylin and eosin (H&E) staining, the intestine tissues were fixed in 4% buffered formalin and then horizontally embedded in paraffin. Tissues were sectioned at 5  $\mu\text{m}$  thickness and performed H&E staining according to standard protocols. The crypt structures of colon or small intestinal villi were pictured, and the wound bed lengths of colons were measured and statistically analyzed using ImageJ. For PAS staining, the small intestines of mice were fixed in Carnoy's solution (absolute ethanol: chloroform: glacial acetic acid = 6:3:1) for 12 h.

Dewaxed sections were hydrated and incubated in 1% periodic acid for 10 min followed by incubation in Schiff's reagent for 10 min. Sections were counterstained with Mayer's hematoxylin for 30 s, washed and dehydrated before mounting with Pertex. For immunohistochemical staining (IHC) of colon tissues, the primary antibody of rat anti-F4/80 (Santa Cruz Biotechnology, USA) and VEGF (Proteintech Group, Chicago, USA) were used. Sections were examined under light microscopy and categorization of immunostaining intensity was performed by three independent researchers. As for immunofluorescence staining of macrophages in colon tissues, rat anti-F4/80 (Santa Cruz Biotechnology, USA, diluted to 1:500 in PBS), rabbit anti-CD80 (Santa Cruz Biotechnology, USA, diluted to 1:500 in PBS), mouse Alexa 647 secondary antibody (Abcam, diluted to 1:1000 in PBS) and rabbit Alexa 488 secondary antibody (Abcam, diluted to 1:1000 in PBS) were applied to immunostaining of total macrophages and M1 type macrophages. Finally, slides were mounted using prolong anti-fade mounting media containing DAPI (Biosharp) and the observations were performed with Leica microsystems.

### ***Bacterial diversity analysis***

DNA was extracted from the stool using the Power Fecal® DNA Isolation Kit (MoBio, Carlsbad, CA USA). The DNA was recovered with 30 ml of buffer in the kit. PCR products were mixed in equidensity ratios. Then, the mixture was purified with Qiagen Gel Extraction Kit (Qiagen, Hilden, Germany). The 16S ribosomal RNA (rRNA) V4 gene was analyzed to evaluate the bacterial diversity using IonS5TMXL Ion 530 Chip (Thermo fisher, Waltham, MA, USA). Sequences analysis was performed by Uparse software (Uparse v7.0.1001,

<http://drive5.com/uparse/>). Sequences with  $\geq 97\%$  similarity were assigned to the same OTUs. Representative sequence for each OTU was screened for further annotation. For each representative sequence, the Silva123 Database was used based on RDP classifier (Version 2.2, <http://sourceforge.net/projects/rdpclassifier/>) algorithm to annotate taxonomic information. For TOP10 and single bacteria abundance analysis, extreme values were not included in the analysis.

### ***Transcriptome sequencing***

For Library preparation for Transcriptome sequencing, total RNA was used as input material for the RNA sample preparations. For prokaryotic samples, mRNA was purified from total RNA using probes to remove rRNA. Fragmentation was carried out using divalent cations under elevated temperature in First Strand Synthesis Reaction Buffer (5X). First strand cDNA was synthesized using random hexamer primer and M-MuLV Reverse Transcriptase, then use RNaseH to degrade the RNA. And in the DNA polymerase I system, use dUTP to replace the dNTP of dTTP as the raw material to synthesize the second strand of cDNA. Remaining overhangs were converted into blunt ends via exonuclease/polymerase activities. After adenylation of 3' ends of DNA fragments, Adaptor with hairpin loop structure were ligated to prepare for hybridization. Then USER Enzyme was used to degrade the second strand of cDNA containing U, in order to select cDNA fragments of preferentially 370~420 bp in length, the library fragments were purified with AMPure XP system (Beckman Coulter, Beverly, USA). Then PCR was performed with Phusion High-Fidelity DNA polymerase, Universal PCR primers and Index (X) Primer. At last, PCR products were purified (AMPure XP system) and library quality was assessed on the Agilent Bioanalyzer 2100 system. For Clustering and

sequencing (Novogene Experimental Department), the clustering of the index-coded samples was performed on a cBot Cluster Generation System using TruSeq PE Cluster Kit v3-cBot-HS (Illumina) according to the manufacturer's instructions. After cluster generation, the library preparations were sequenced on an Illumina Novaseq platform and 150 bp paired-end reads were generated. In the data analysis stage, quality control, reads mapping to the reference genome, novel gene and gene structure analyzing, quantification of gene expression level, differential expression analysis and GO and KEGG enrichment analysis of differentially expressed genes were conducted.

## Supplementary tables

**Supplementary Table 1 Scoring system for division of PR and R mice.**

| Score |             |                       |                               |          |
|-------|-------------|-----------------------|-------------------------------|----------|
| (IBD) | DAI         |                       |                               | Colon    |
|       | Weight loss | Stool consistency     | Blood                         | Length   |
| 0     | None        | Normal                | Negative hemocult             | 8.5-9 cm |
| 1     | 1-5%        | Soft but still formed | Positive hemocult             | 8-8.5 cm |
| 2     | 6-10%       | Very soft; wet        | Blood traces in stool visible | 7.5-8 cm |
| 3     | 11-18%      | Watery diarrhea       | Gross rectal bleeding         | 7-7.5 cm |
| 4     | >18%        |                       |                               | 6.5-7 cm |
| (IRD) |             |                       |                               |          |
| 0     |             |                       |                               | 8.5-9 cm |
| 1     |             |                       |                               | 8-8.5 cm |
| 2     |             |                       |                               | 7.5-8 cm |

|   |  |  |  |          |
|---|--|--|--|----------|
| 3 |  |  |  | 7-7.5 cm |
|---|--|--|--|----------|

137 **IBD: inflammatory bowel disease; IRD: intestinal radiation disease.**

138 **Supplementary Table 2 Primers for PCR and sequencing.**

| Gene                              | Primer  | Sequence (5'-3')        |
|-----------------------------------|---------|-------------------------|
| <b>Primers for qRT-PCR</b>        |         |                         |
| <i>GAPDH</i>                      | forward | TGTTTCCTCGTCCCGTAGA     |
|                                   | reverse | CAATCTCCACTTTGCCACTG    |
| <i>Glut</i>                       | forward | TATCCTGTTGCCCTTCTGC     |
|                                   | reverse | CCGACCCTCTTCTTTCATCTC   |
| <i>Occludin</i>                   | forward | GCCTTCCTGGACCACAACA     |
|                                   | reverse | CCGTCGGATCATAGAACTCG    |
| <i>WNT4</i>                       | forward | GAGAAGTTTGACGGTGCC      |
|                                   | reverse | GCCGTCAATGGCTTTAG       |
| <i>CD206</i>                      | forward | CATTCCCTCAGCAAGCGATG    |
|                                   | reverse | GGGTTCCATCACTCCACTCA    |
| <i>CD80</i>                       | forward | TTCGTCTTTCACAAGTGTCTTCA |
|                                   | reverse | TGCCAGTAGATTCGGTCTTCA   |
| <b>Primers for sequencing</b>     |         |                         |
| 515F                              |         | GTGCCAGCMGCCGCGGTAA     |
| 806R                              |         | GGACTACHVGGGTWTCTAAT    |
| <b>16S rRNA Primers for q-PCR</b> |         |                         |
| <i>Bacterial universal</i>        | forward | ACTCCTACGGGAGGCAGCAG    |
|                                   | reverse | ATTACCGCGGCTGCTGG       |
| <i>A. muciniphila</i>             | forward | CAGCACGTGAAGGTGGGGAC    |
|                                   | reverse | CCTTGCGGTTGGCTTCAGAT    |
| <i>L. murinus</i>                 | forward | ACTGGCGATGTTACCTTTGG    |
|                                   | reverse | CAGGCCTTGTATTGGTGGT     |



**Supplementary Table 3 Notes for the numbers in Fig. 2j.**

|    |                     |    |                  |    |                     |    |                     |
|----|---------------------|----|------------------|----|---------------------|----|---------------------|
| 01 | Actinobacteria      | 02 | Synergistia      | 03 | Caldatribacteriia   | 04 | Anaerolineae        |
| 05 | Kiritimatiellae     | 06 | Aminicenantia    | 07 | Deferribacteres     | 08 | Cyabobacteriia      |
| 09 | Saccharimonadia     | 10 | Nanosalinia      | 11 | Halobacteria        | 12 | Desulfovibrionia    |
| 13 | Coprothermobacteria | 14 | Coriobacteriia   | 15 | Bacteroidia         | 16 | Spirochaetia        |
| 17 | Fibrobacteria       | 18 | Bacteroidia      | 19 | Vampirivibrionia    | 20 | Clostridia          |
| 21 | Campylobacteria     | 22 | Methanomicrobia  | 23 | Clostridia          | 24 | Alphaproteobacteria |
| 25 | Desulfovibrionia    | 26 | Bacilli          | 27 | Negativicutes       | 28 | D8A-2               |
| 29 | Bacilli             | 30 | Coriobacteriia   | 31 | Methanobacteria     | 32 | Fusobacteriia       |
| 33 | Gammaproteobacteria | 34 | Verrucomicrobiae | 35 | Alphaproteobacteria |    |                     |

**Supplementary figures**

**Wang Bin et al., Supplementary Fig.1**

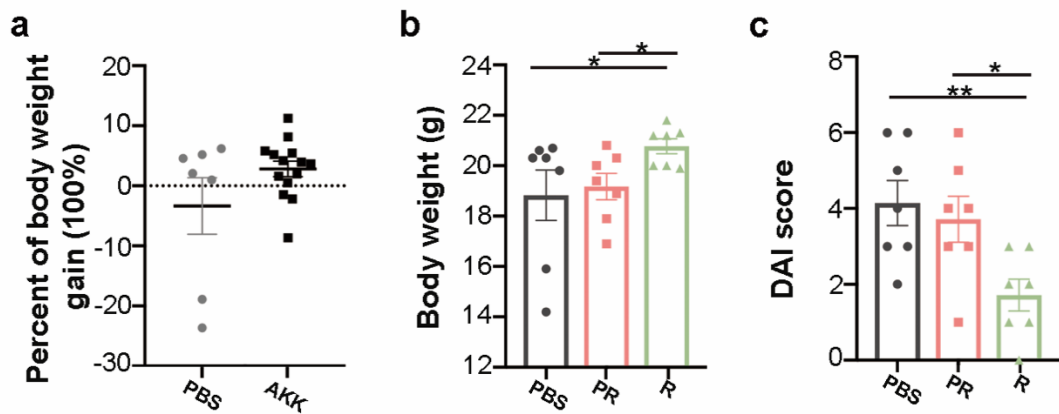

**Supplementary Fig. 1 A. muciniphila colonization correlates with its therapeutic efficacy to DSS-induced colitis.**

(a) The percent of body weight gain at day 10. (b) The body weights of mice at day 10. (c) The DAI scores of mice at day 10. (b, c) Significance was determined using one-way ANOVA corrected for multiple comparisons with a LSD-t test; \* $P < 0.05$ , \*\* $P < 0.01$ . Data are mean  $\pm$  SD.

Wang Bin et al., Supplementary Fig.2

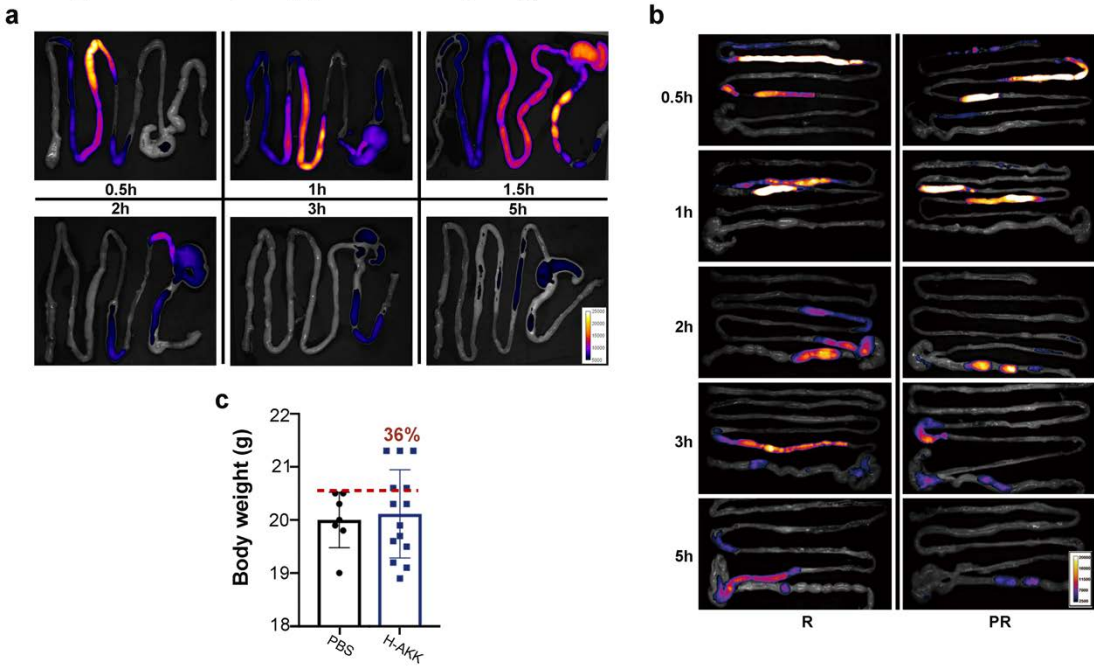

**Supplementary Fig. 2 The gastrointestinal dynamics of *A. muciniphila*.**

**(a)** The distribution of *A. muciniphila* in the gastrointestinal tract of mice with colitis in 5 h. *A. muciniphila* was labelled by DIR. **(b)** The dynamic of DIR-labelled *A. muciniphila* in R and PR group. Images were representative of three biological replicates. **(c)** The body weights of mice treated by PBS or *A. muciniphila* of high concentration at day 10.

Wang Bin et al., Supplementary Fig.3

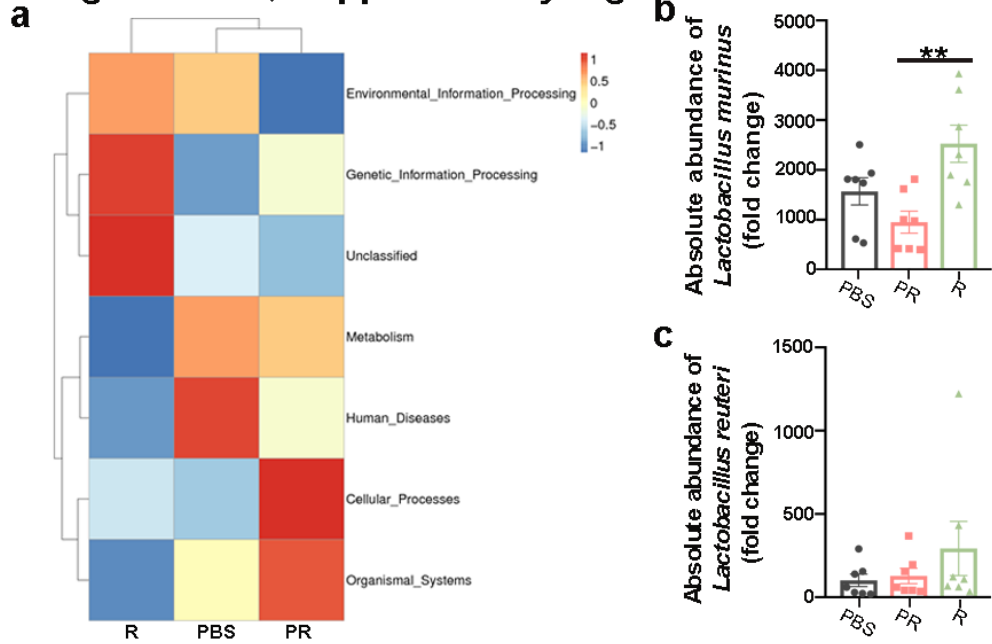

**Supplementary Fig. 3 The colonization intensity of *A. muciniphila* affects the gut microecology of mice.**

(a) The difference heat-map of gut bacteria functions. (b, c) Statistical results of absolute abundance of *Lactobacillus murinus* and *Lactobacillus reuteri* in the feces of mice (outliers removed). Significance is determined using Student's *t*-test;  $**P < 0.01$ . Data are mean  $\pm$  SD.

**Wang Bin et al., Supplementary Fig.4**

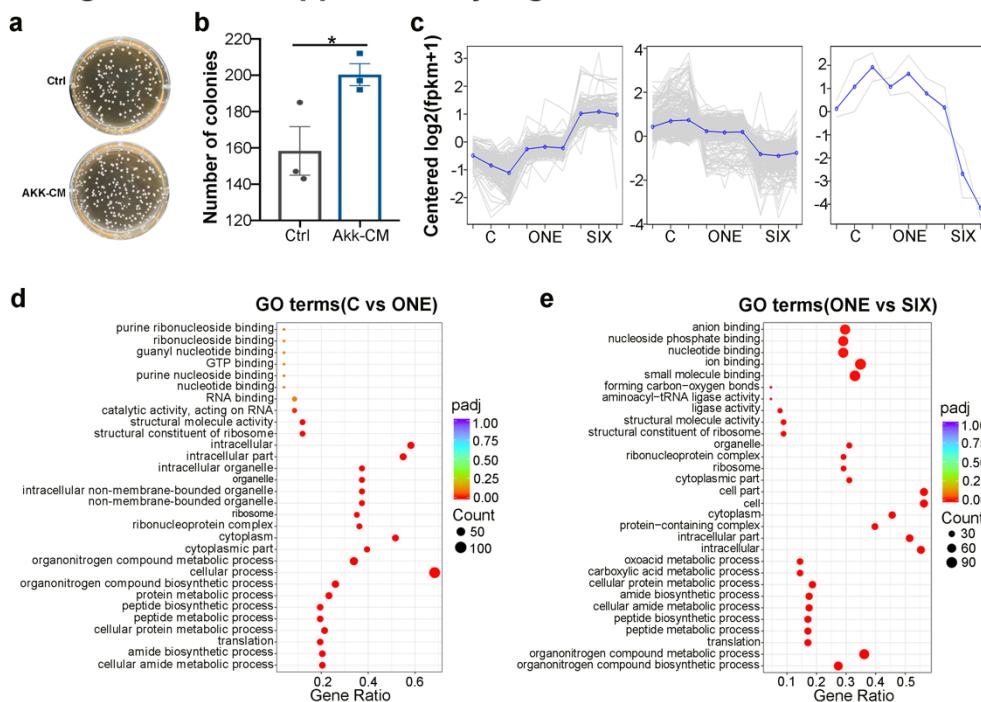

**Supplementary Fig. 4 Live *A. muciniphila* reprograms gene profile of *L. murinus*.**

(a) Representative pictures of colonies. (b) The number of colonies. Significant differences are indicated:  $*P < 0.05$  by Student's *t*-test between each two cohorts. (c) Cluster line graphs of expression patterns of different experimental groups. Different gene sets are divided into several clusters by H-cluster, and genes in the same cluster have similar expression patterns under different processing conditions. (d, e) The GO function enrichment analysis of the differential genes with up-regulation in the ONE group compared with the C group (d) and in the SIX group compared with the ONE group (e). The enrichment takes  $\text{padj} < 0.05$  as the threshold for significant enrichment.

Wang Bin et al., Supplementary Fig.5

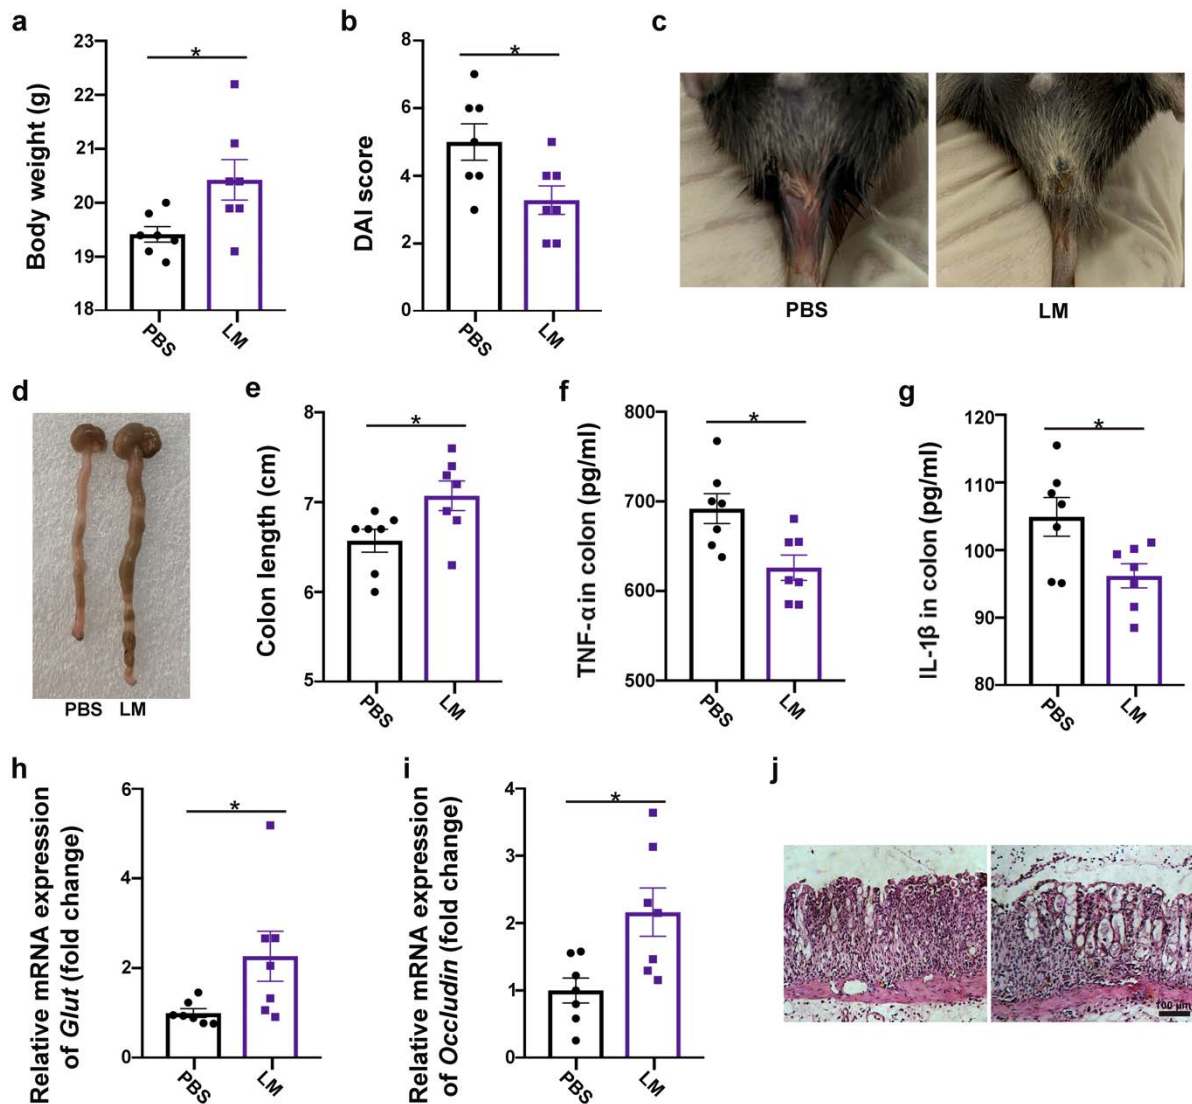

**Supplementary Fig. 5 *Lactobacillus murinus* alleviates DSS-induced colitis.**

Groups: PBS, mice were treated by PBS; LM, mice were treated by *L. murinus* ( $1 \times 10^8$  CFU/200  $\mu$ l per mouse). **(a)** The body weight. **(b)** Statistical results of DAI score. **(c)** Representative photographs of rectal bleeding of IBD mice on day 10. **(d)** Representative photographs of colons of mice. **(e)** Statistical results of colon length of mice. **(f, g)** The levels of TNF- $\alpha$  and IL-1 $\beta$  in inflamed colon of mice were measured by ELISA. **(h, i)** The relative mRNA expression levels of *Glut* and *Occludin* were examined in colon tissues from mice by qRT-PCR. **(j)** Representative H&E images of colon (scar bar: 100  $\mu$ m). Significance is

determined using Student's *t*-test; \**P* < 0.05.

# Wang Bin et al., Supplementary Fig.6

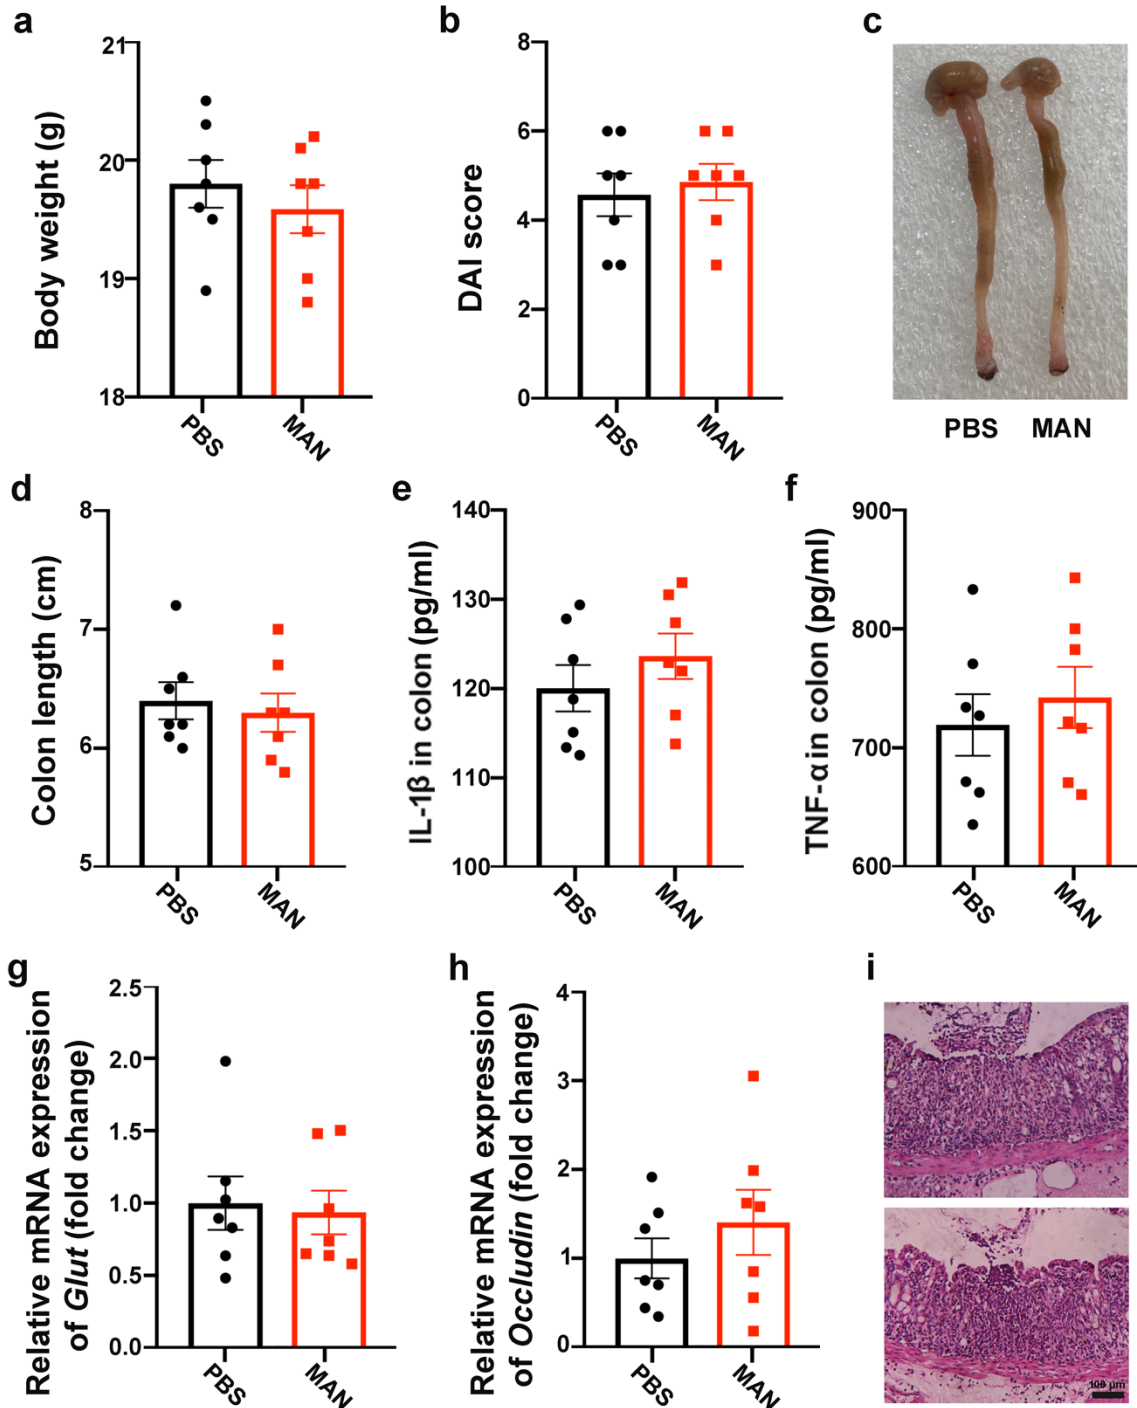

**Supplementary Fig. 6 Mannose has no therapeutic impact on DSS-induced colitis.**

Groups: PBS, mice were treated by PBS; MAN, mice were treated by mannose (10  $\mu$ g/per



mouse). (a) The body weight. (b) Statistical results of DAI score. (c) Representative photographs of colons. (d) Statistical results of colon length. (e, f) The levels of IL-1 $\beta$  and TNF- $\alpha$  in inflamed colon of mice were measured by ELISA. (g, h) The relative mRNA expression levels of *Glut* and *Occludin* were examined in colon tissues from mice by qRT-PCR. (i) Representative H&E images of colon (scar bar: 100  $\mu$ m). Significance is determined using Student's *t*-test.

### Wang Bin et al., Supplementary Fig.7

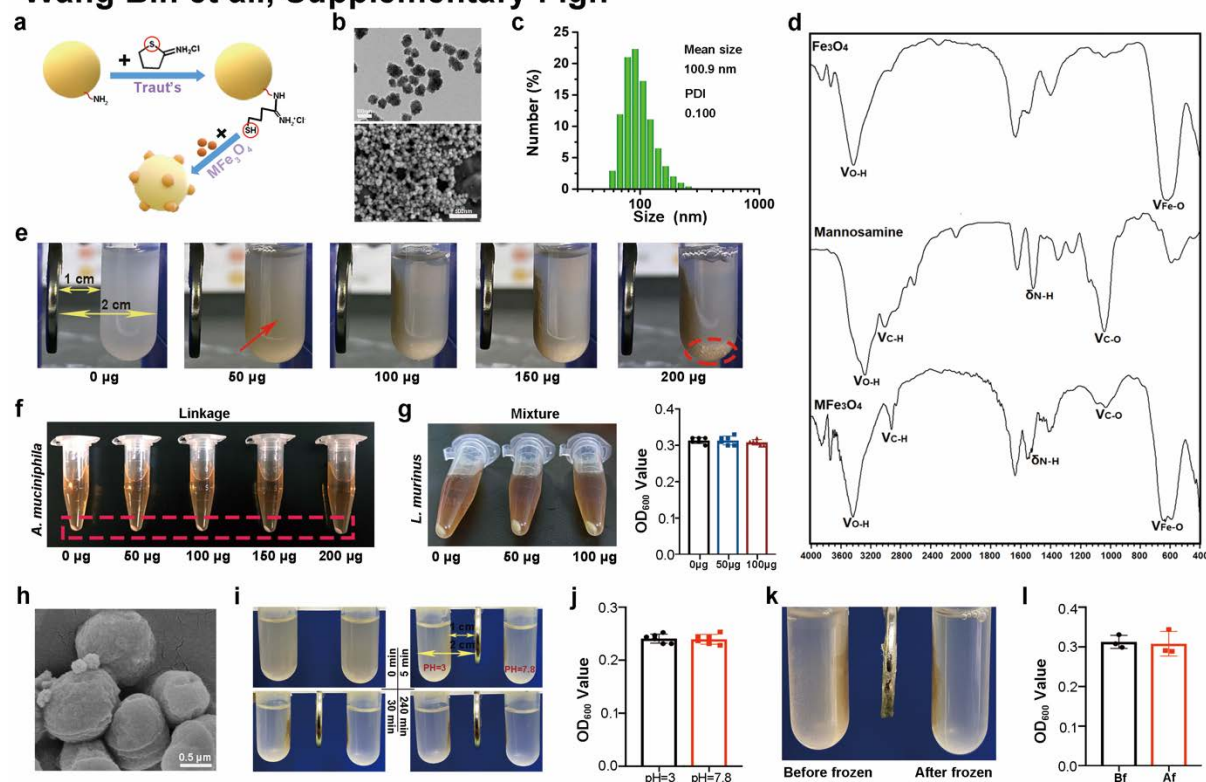

**Supplementary Fig. 7 Preparation and characterization of magnetic *A. muciniphila* - AKK@MFe<sub>3</sub>O<sub>4</sub>.**

(a) Preparation scheme of AKK@MFe<sub>3</sub>O<sub>4</sub>, the red circles represent the reaction site. (b) TEM (up) and SEM images (down) of Fe<sub>3</sub>O<sub>4</sub> nanoclusters. (c) Size distributions of Fe<sub>3</sub>O<sub>4</sub> nanoclusters. (d) The FT-IR spectra of Fe<sub>3</sub>O<sub>4</sub>, D-mannosamine and MFe<sub>3</sub>O<sub>4</sub> nanoclusters. (e) The magnetic attraction images of AKK@MFe<sub>3</sub>O<sub>4</sub> with various concentrations of MFe<sub>3</sub>O<sub>4</sub>

decoration under a gentle shaking. (f) Representative photographs of precipitate agglomerate of *A. muciniphila* that cultured for 12 h. *A. muciniphila* was linked with  $\text{MFe}_3\text{O}_4$  of different concentration for 6 h. (g) Representative photographs of precipitate agglomerate and  $\text{OD}_{600}$  value of *L. murinus* that cultured for 24 h. *L. murinus* was mixed with  $\text{MFe}_3\text{O}_4$  of different concentration for 6 h. (h) The SEM images of  $\text{AKK@MFe}_3\text{O}_4$  after culturing in anaerobic environment for 6 h (scar bar:  $0.5\ \mu\text{m}$ ). (i) The magnetic attraction images of  $\text{AKK@MFe}_3\text{O}_4$  under simulated gastric juice (pH 3.0) and intestinal fluid (pH 7.8) at various times. (j) The  $\text{OD}_{600}$  value of  $\text{AKK@MFe}_3\text{O}_4$  following incubating in simulated gastrointestinal environment of different pHs for 6 h. (k, l) The magnetic attraction images (k) and  $\text{OD}_{600}$  value (l) of  $\text{AKK@MFe}_3\text{O}_4$  before freezing (Bf) and after thawing (Af) (stored in PBS containing 25% glycerol).

### Wang Bin et al., Supplementary Fig.8

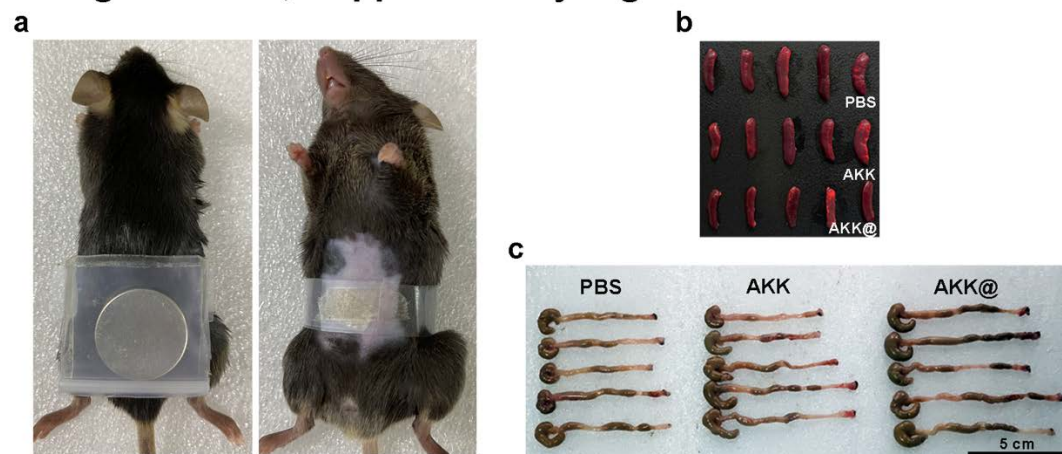

### Supplementary Fig. 8 The magnetic *A. muciniphila* improves the therapeutic efficacy to colitis.

(a) Mouse with the magnetic device. (b) Representative photographs of spleens of mice. (c) Representative photographs of colons of mice (scar bar: 5 cm).

## Wang Bin et al., Supplementary Fig.9

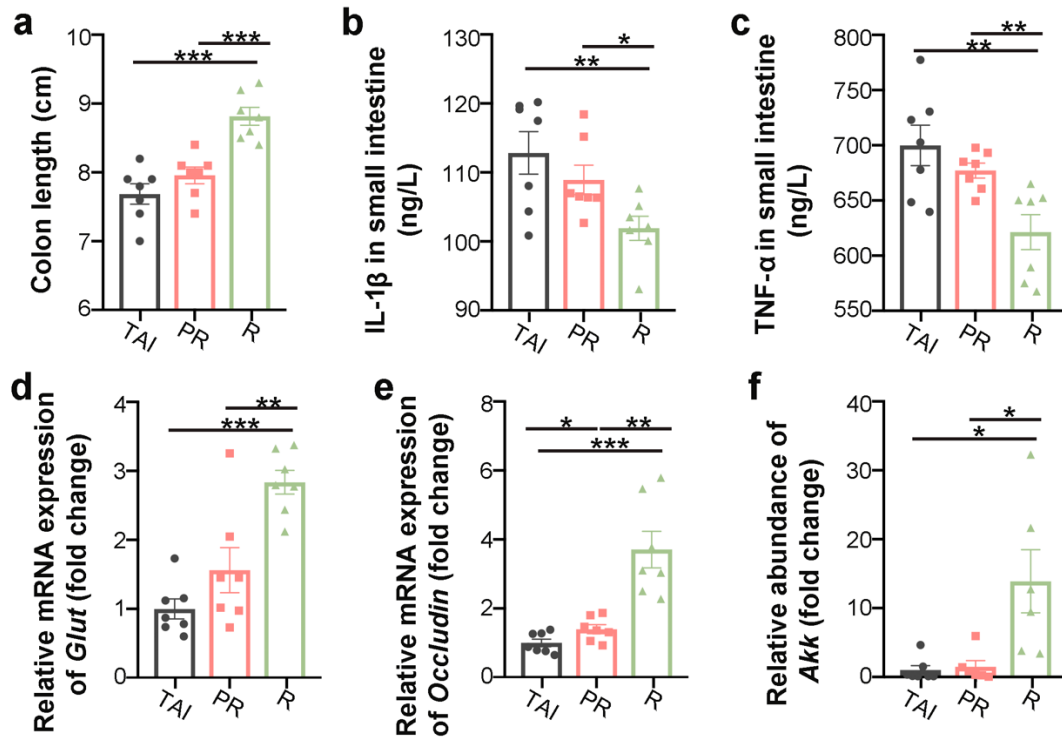

**Supplementary Fig. 9 The colonization of *A. muciniphila* correlates to therapeutic efficacy against radiation-induced small intestinal injury.**

All experimental mice were received 12 Gy  $\gamma$ -ray total abdominal irradiation (TAI). Groups: TAI, the mice were administrated with PBS; PR, poor response to *A. muciniphila*; R, response to *A. muciniphila*. **(a)** Statistical result of colon length of mice. **(b, c)** The levels of IL-1 $\beta$  and TNF- $\alpha$  in small intestines of mice were measured by ELISA. **(d, e)** The relative mRNA expression levels of *Glut* and *Occludin* were examined in small intestines from mice by qRT-PCR. **(f)** The relative abundance of *A. muciniphila* in the small intestinal mucosa was detected by q-PCR. Significance was determined using one-way ANOVA corrected for multiple comparisons with a LSD-t test; \* $P < 0.05$ , \*\* $P < 0.01$ , \*\*\* $P < 0.001$ . Data are mean  $\pm$  SD.



## Wang Bin et al., Supplementary Fig.10

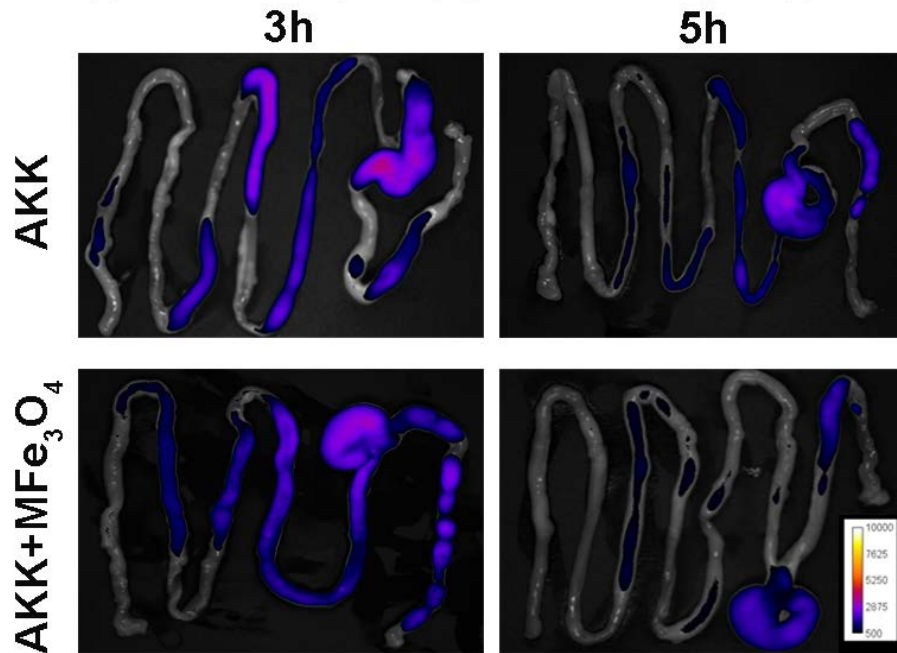

**Supplementary Fig. 10** The retention of *A. muciniphila* in AKK and AKK+ groups (single gavage treatment).

## Wang Bin et al., Supplementary Fig.11

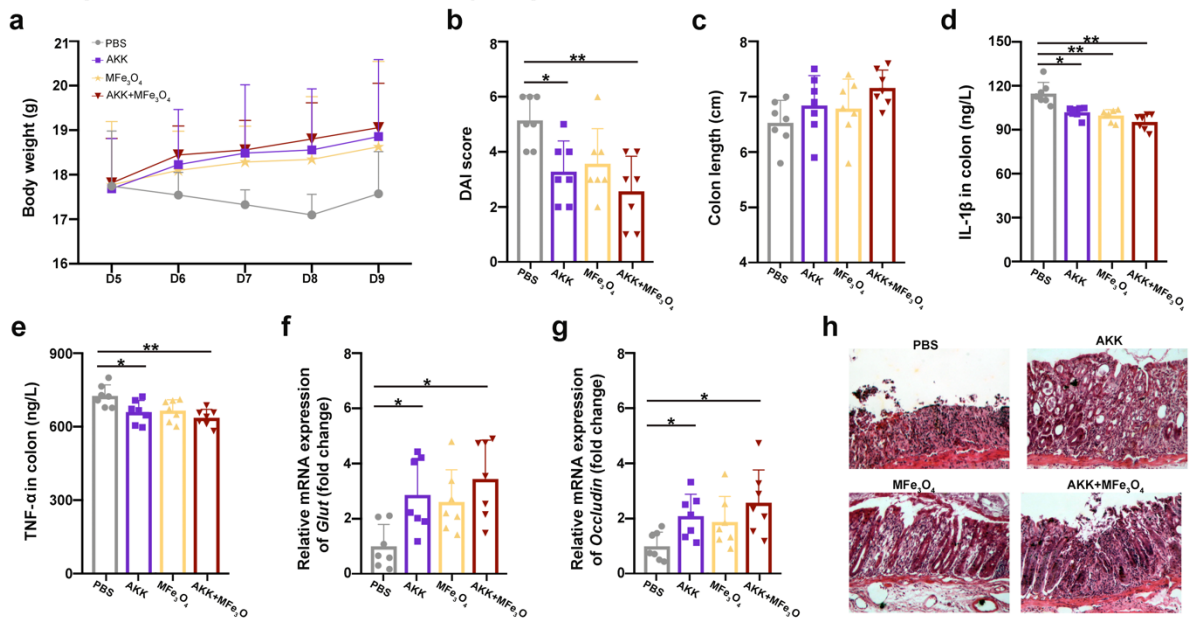

**Supplementary Fig. 11** The therapeutic effects of PBS, *A. muciniphila*, MFe<sub>3</sub>O<sub>4</sub> and AKK+MFe<sub>3</sub>O<sub>4</sub> on DSS-induced colitis.

(a) Daily body weight of the mice. (b) The DAI score of colitis assessed on day 10. (c)

Statistical results of length of colon. **(d, e)** The levels of IL-1 $\beta$  and IL-6 in colons of mice were measured by ELISA. **(f, g)** The relative mRNA expression levels of *Glut* and *Occludin* were examined in colon tissues from mice by qRT-PCR. **(h)** Representative H&E images.

## Wang Bin et al., Supplementary Fig.12

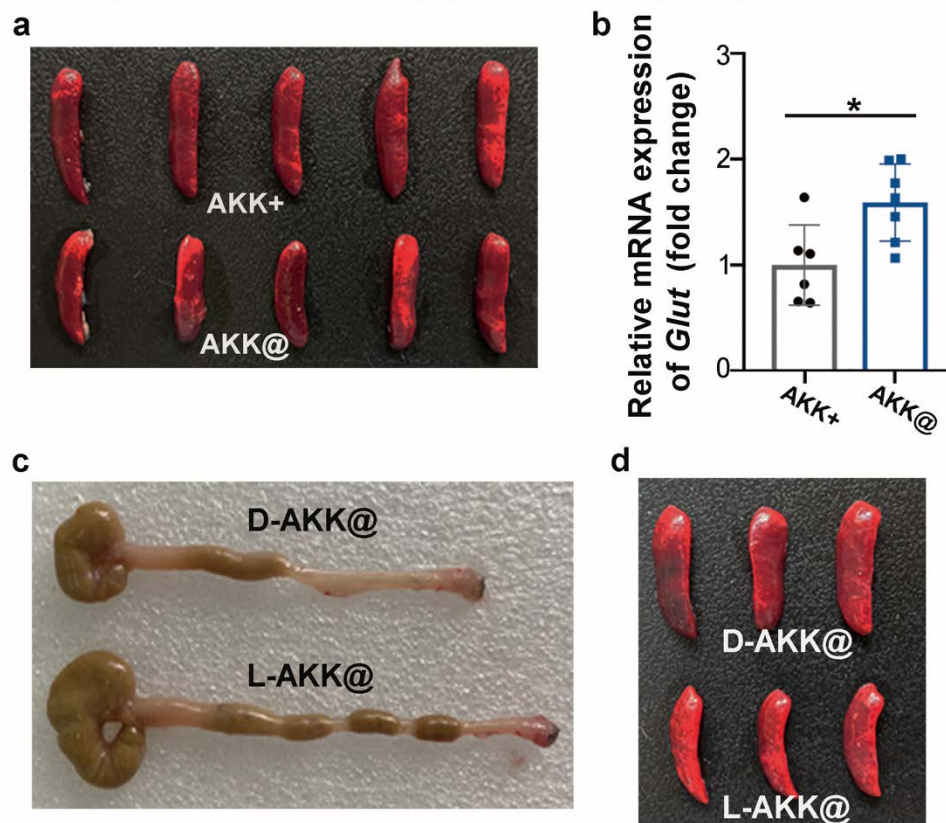

**Supplementary Fig. 12 *A. muciniphila* colonization dictates therapeutic efficacy of AKK@MFe<sub>3</sub>O<sub>4</sub> to DSS-induced colitis.**

**(a)** Representative photographs of spleens of mice. **(b)** The relative mRNA expression levels of *Glut* were examined in colon tissues from mice by qRT-PCR. **(c)** Representative photographs of colons of mice (scar bar: 5 cm). **(d)** Representative photographs of spleens of mice.

# Wang Bin et al., Supplementary Fig.13

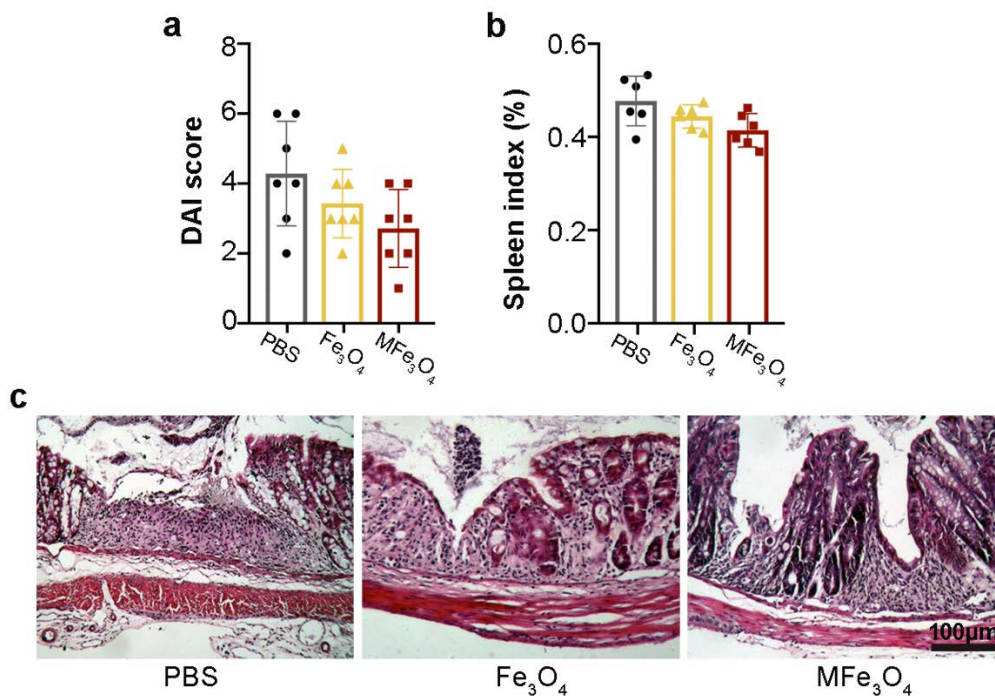

**Supplementary Fig. 13 Fe<sub>3</sub>O<sub>4</sub> and MFe<sub>3</sub>O<sub>4</sub> improve the recovery of DSS-induced colitis.**

**(a)** The DAI score. **(b)** Statistical results of spleen index. **(c)** Representative H&E images (scale bar: 100 μm).

# Wang Bin et al., Supplementary Fig.14

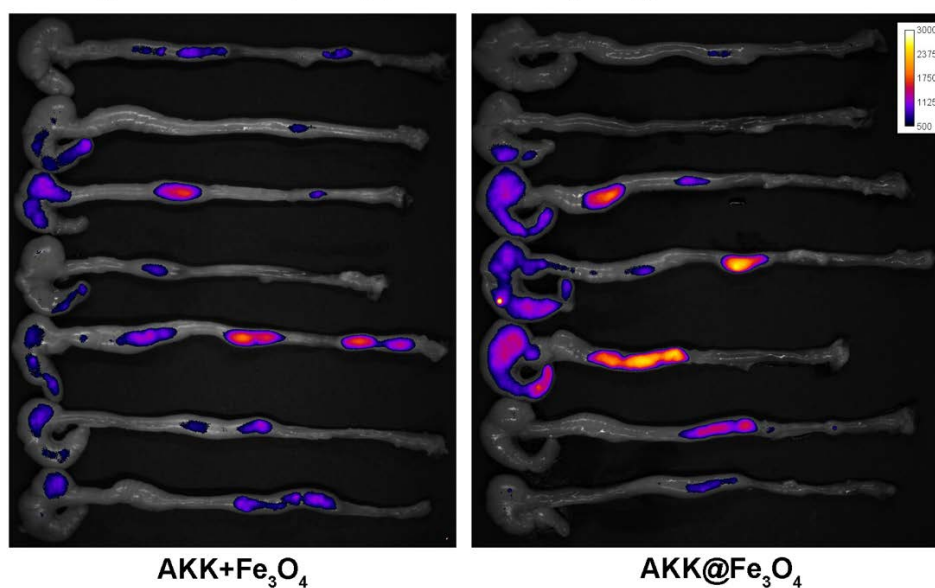

**Supplementary Fig. 14 AKK@MFe<sub>3</sub>O<sub>4</sub> was excreted from the intestine of mice eventually.**

257 The mice with colitis were orally administrated with AKK+Fe<sub>3</sub>O<sub>4</sub> or AKK@MFe<sub>3</sub>O<sub>4</sub> for three  
258 days respectively and *A. muciniphila* was labelled by DIR. The fluorescence images of colons  
259 were obtained at 24 h following the last treatment.
